# Supplementary material
Source: PubMed Central journal article supplement (PMC10193243)
Supplement: NIHMS1877582-supplement-Supplement.pdf [file NIHMS1877582-supplement-Supplement.pdf]

## **Supplementary Appendix**

This appendix has been provided by the authors to give readers additional information about their work.

Supplement to: Gabriela Paz-Bailey, Maya Sternberg, Kiersten Kugeler, et al. Covid-19 Rates by Time since Vaccination during Delta Variant Predominance. NEJM Evidence. DOI: 10.1056/EVIDoa2100057.

## Supplement

### COVID-19 rates by time since vaccination during Delta variant predominance

Gabriela Paz-Bailey, M.D., Ph.D., M.Sc.<sup>1</sup>, Maya Sternberg, Ph.D.<sup>1</sup>, Kiersten Kugeler, Ph.D.<sup>1</sup>, Brooke Hoots, Ph.D.<sup>1</sup>, Avnika Amin, Ph.D.<sup>1</sup>, Amelia G. Johnson, Dr.P.H.<sup>1</sup>, Bree Barbeau, M.P.H.<sup>2</sup>, Nagla S. Bayoumi, DrPH<sup>3</sup>, Daniel Bertolino, M.P.H.<sup>4</sup>, Rachelle Boulton, M.S.P.H.<sup>2</sup>, Catherine M. Brown, D.V.M.<sup>5</sup>, Katherine Busen, M.P.H.<sup>6</sup>, Michael Cima, Ph.D.<sup>7</sup>, Cherie Drenzek, D.V.M.<sup>8</sup>, Daniel Dutkiewicz, Ph.D.<sup>6</sup>, Ashley Gent, M.P.H.<sup>9</sup>, Gillian Haney, M.P.H.<sup>5</sup>, Liam Hicks, M.P.H.<sup>10</sup>, Sarah Hook, Ph.D.<sup>1</sup>, Amanda Jara, D.V.M.<sup>8</sup>, Amanda Jones, M.P.H.<sup>11</sup>, Ishrat Kamal-Ahmed, Ph.D.<sup>12</sup>, Sarah Kangas, M.P.H.<sup>1</sup>, FNU Kanishka, M.P.H.<sup>12</sup>, Saadia I. Khan, M.P.H.<sup>3</sup>, Samantha K. Kirkendall, M.Sc.<sup>13</sup>, Anna Kocharian, M.S.<sup>14</sup>, B. Casey Lyons, M.P.H.<sup>15</sup>, Priscilla Lauro, M.P.H.<sup>10</sup>, Donald McCormick, M.S.H.I.<sup>7</sup>, Chelsea McMullen, M.Sc.<sup>16</sup>, Lauren Milroy, M.P.H.<sup>17</sup>, Heather Reese, Ph.D.<sup>1</sup>, Jessica Sell, M.P.H.<sup>4</sup>, Allison Sierocki, M.P.H.<sup>18</sup>, Elizabeth Smith, M.P.H.<sup>8</sup>, Daniel Sosin, M.D.<sup>16</sup>, Emma Stanislawski, M.P.H.<sup>16</sup>, Kyle Strand, B.S.<sup>12</sup>, Thomas Troelstrup, M.P.H.<sup>9</sup>, Kathryn A. Turner, Ph.D.<sup>13</sup>, Hailey Vest, M.P.H.<sup>17</sup>, Sydni Warner, M.S.<sup>14</sup>, Caleb Wiedeman, M.P.H.<sup>18</sup>, Benjamin Silk, Ph.D.<sup>1</sup>, Heather M. Scobie, Ph.D.<sup>1</sup>

1. Epidemiology Task Force, COVID-19 Response Team, U.S. Centers for Disease Control and Prevention, Atlanta, GA
2. Utah Department of Health, Salt Lake City
3. New Jersey Department of Health, Trenton, New Jersey
4. New York City Department of Health and Mental Hygiene, Long Island City, New York
5. Massachusetts Department of Public Health, Boston, Massachusetts
6. Michigan Department of Health and Human Services, Lansing, Michigan
7. Arkansas Department of Health, Little Rock, Arkansas
8. Georgia Department of Health, Atlanta, Georgia
9. Florida Department of Health, Tallahassee, Florida
10. Arizona Department of Health Services, Phoenix, Arizona
11. Center for Surveillance, Epidemiology, and Laboratory Services, U.S. Centers for Disease Control and Prevention, Atlanta, GA
12. Nebraska Department of Health and Human Services, Lincoln, Nebraska
13. Idaho Department of Health and Welfare, Boise, Idaho
14. Wisconsin Department of Health Services, Madison, Wisconsin
15. Data Analytics and Visualization Task Force, CDC COVID-19 Response Team, U.S. Centers for Disease Control and Prevention, Atlanta, GA
16. New Mexico Department of Health, Albuquerque, New Mexico
17. Indiana Department of Health, Indianapolis, Indiana
18. Tennessee Department of Health, Nashville, Tennessee

## Table of Contents

|                                                                                                                                                                                                                                                                                        |    |
|----------------------------------------------------------------------------------------------------------------------------------------------------------------------------------------------------------------------------------------------------------------------------------------|----|
| Supplemental Table 1. Unadjusted life table estimates of the hazard rate of COVID-19 cases and deaths per 100,000 vaccinated persons per month by time since vaccination during June, July and August, 15 jurisdictions, January 3rd-September 4, 2021, United States* .....           | 3  |
| Supplemental Table 2. Adjusted rate ratios for COVID-19 case rates by time since vaccination, 15 jurisdictions, August 1-September 4, 2021, United States.....                                                                                                                         | 4  |
| Supplemental Table 3. Adjusted rate ratios for COVID-19 death rates by time since vaccination, 14 jurisdictions, August 1-September 4, 2021, United States.....                                                                                                                        | 6  |
| Supplemental Figure 1. Distribution of the numbers of days after receiving vaccine dose to positive SARS-CoV-2 positive test among persons vaccinated with a) Pfizer-BioNTech, b) Moderna and c) Johnson & Johnson, 15 jurisdictions, January 3-September 4, 2021, United States ..... | 8  |
| Supplemental Figure 2a-m. COVID-19 case hazard rates by vaccination cohort and age group for Pfizer-BioNTech (a-e), Moderna (f-i) and Janssen-J&J (j-m), 15 Jurisdictions, January 3-September 4, 2021, United States .....                                                            | 9  |
| Supplemental Figure 3a-3c. COVID-19 case rates per 100,000 person-weeks by vaccination cohort and region for a) Pfizer-BioNTech, b) Moderna and c) Janssen-J&J, 15 Jurisdictions, August 1-September 4, 2021, United States .....                                                      | 12 |
| Supplemental Figure 4a-l. COVID-19 death hazard rates by vaccination cohort and age group for Pfizer-BioNTech (a-d), Moderna (e-h) and Janssen-J&J (i-l), 14 Jurisdictions, January 3-September 4, 2021, United States .....                                                           | 13 |
| Supplemental Figure 5a-5c. COVID-19 death rates by vaccination cohort and region for a) Pfizer-BioNTech, b) Moderna and c) Janssen-J&J, 15 Jurisdictions, August 1-September 4, 2021, United States .....                                                                              | 16 |

**Supplemental Table 1. Unadjusted life table estimates of the monthly hazard rate of COVID-19 cases and deaths per 100,000 vaccinated persons per month by time since vaccination during June - August, 15 jurisdictions, January 3<sup>rd</sup>-September 4, 2021, United States\***

| Cohort         | Hazard rate of SARS-CoV-2 cases per 100,000 vaccinated persons per month |                      |                         | Hazard rate of SARS-CoV-2 deaths per 100,000 vaccinated persons per month |                |                   |
|----------------|--------------------------------------------------------------------------|----------------------|-------------------------|---------------------------------------------------------------------------|----------------|-------------------|
|                | JUN                                                                      | JUL                  | AUG                     | JUN                                                                       | JUL            | AUG               |
| <b>JAN-FEB</b> | 42.9 (41.5, 44.3)                                                        | 268.9 (265.0, 272.0) | 1633 (1608.0, 1632.0)   | 1.4 (1.2,1.7)                                                             | 7.8 (7.2, 8.4) | 37.9 (36.0, 39.9) |
| <b>MAR-APR</b> | 31.0 (30.3, 31.7)                                                        | 190.4 (188.5, 192.0) | 1196.0 (1183.0, 1195.0) | 0.6 (0.5, 0.7)                                                            | 3.0 (2.8, 3.2) | 15.5 (14.8, 16.2) |
| <b>MAY-JUN</b> | 15.0 (14.4, 15.7)                                                        | 113.9 (112.0, 115.6) | 810.6 (800.6, 814.1)    | 0.2 (0.1, 0.3)                                                            | 0.9 (0.7, 1.0) | 5.8 (5.2, 6.4)    |

\*Unadjusted hazard rate is estimated using life table analysis calculated at one-month intervals from June to August for each vaccination cohort.

Note: 95% Confidence intervals in parentheses. The widths of the intervals have not been adjusted for multiplicity and any the inferences drawn may not be reproducible. The hazard rate is the first derivative of the cumulative hazard function at time t, which is the slope of the cumulative hazard at time t. Potential evidence for waning may be detected by comparing the changing slope of the hazard functions for each cohort, which corresponds to assessing the acceleration of the cumulative hazard function. For example, from June to July and July to August the cumulative hazard function for a cohort vaccinated in January-February increases more rapidly (accelerates) relative to a cohort vaccinated later in the year at the same time, this pattern may be suggestive of waning.

**Supplemental Table 2. Adjusted rate ratios for COVID-19 case rates by time since vaccination, 15 jurisdictions, August 1-September 4, 2021, United States**

| Category                                | January-June cohort vs. July cohort                                       | 2-month cohorts vs. July cohort                                             |                                                                        |                                                                     |
|-----------------------------------------|---------------------------------------------------------------------------|-----------------------------------------------------------------------------|------------------------------------------------------------------------|---------------------------------------------------------------------|
|                                         | Rate ratio for COVID-19 case rate comparing January-June to July cohorts* | Rate ratio for COVID-19 case rate comparing January-February to July cohort | Rate ratio for COVID-19 case rate comparing March-April to July cohort | Rate ratio for COVID-19 case rate comparing May-June to July cohort |
| <b>Overall cases (15 jurisdictions)</b> | 2.04 (1.99 - 2.09)                                                        | 3.44 (3.36 - 3.53)                                                          | 2.29 (2.23 - 2.34)                                                     | 1.44 (1.41 - 1.48)                                                  |
| <b>Age</b>                              |                                                                           |                                                                             |                                                                        |                                                                     |
| 12-17                                   | 1.73 (1.62 - 1.85)                                                        | 4.08 (3.07 - 5.42)                                                          | 2.9 (2.68 - 3.14)                                                      | 1.55 (1.45 - 1.65)                                                  |
| 18-49                                   | 2.21 (2.14 - 2.28)                                                        | 3.94 (3.81 - 4.07)                                                          | 2.44 (2.36 - 2.52)                                                     | 1.49 (1.45 - 1.54)                                                  |
| 50-64                                   | 1.9 (1.8 - 2.0)                                                           | 3.08 (2.91 - 3.26)                                                          | 1.93 (1.83 - 2.04)                                                     | 1.3 (1.23 - 1.37)                                                   |
| 65-79                                   | 1.8 (1.65 - 1.98)                                                         | 2.23 (2.03 - 2.45)                                                          | 1.71 (1.56 - 1.87)                                                     | 1.22 (1.11 - 1.35)                                                  |
| 80+                                     | 1.51 (1.28 - 1.78)                                                        | 1.92 (1.63 - 2.27)                                                          | 1.24 (1.05 - 1.46)                                                     | 1.08 (0.91 - 1.29)                                                  |
| <b>Vaccine product</b>                  |                                                                           |                                                                             |                                                                        |                                                                     |
| Pfizer-BioNTech                         | 2.26 (2.19 - 2.33)                                                        | 3.82 (3.7 - 3.95)                                                           | 2.52 (2.45 - 2.61)                                                     | 1.64 (1.59 - 1.69)                                                  |
| Moderna                                 | 2.43 (2.29 - 2.58)                                                        | 3.85 (3.62 - 4.09)                                                          | 2.62 (2.47 - 2.78)                                                     | 1.58 (1.49 - 1.68)                                                  |
| Janssen-Johnson & Johnson (J&J)*        | 1.26 (1.2 - 1.32)                                                         | NA                                                                          | 1.49 (1.42 - 1.56)                                                     | 0.86 (0.81 - 0.9)                                                   |
| <b>Vaccine product and age</b>          |                                                                           |                                                                             |                                                                        |                                                                     |
| <b>Pfizer-BioNTech</b>                  |                                                                           |                                                                             |                                                                        |                                                                     |
| 12-17                                   | 1.73 (1.63 - 1.85)                                                        | 4.09 (3.08 - 5.43)                                                          | 2.9 (2.68 - 3.14)                                                      | 1.55 (1.45 - 1.66)                                                  |
| 18-49                                   | 2.42 (2.32 - 2.53)                                                        | 4.15 (3.97 - 4.34)                                                          | 2.58 (2.47 - 2.69)                                                     | 1.68 (1.61 - 1.76)                                                  |
| 50-64                                   | 2.44 (2.26 - 2.65)                                                        | 3.96 (3.65 - 4.3)                                                           | 2.42 (2.23 - 2.62)                                                     | 1.67 (1.54 - 1.82)                                                  |
| 65-79                                   | 2.48 (2.15 - 2.85)                                                        | 3.0 (2.6 - 3.45)                                                            | 2.3 (2.0 - 2.65)                                                       | 1.52 (1.31 - 1.76)                                                  |
| 80+                                     | 1.99 (1.55 - 2.55)                                                        | 2.41 (1.88 - 3.09)                                                          | 1.58 (1.23 - 2.03)                                                     | 1.32 (1.01 - 1.73)                                                  |
| <b>Moderna</b>                          |                                                                           |                                                                             |                                                                        |                                                                     |
| 18-49                                   | 2.62 (2.44 - 2.83)                                                        | 4.59 (4.25 - 4.96)                                                          | 2.93 (2.71 - 3.16)                                                     | 1.69 (1.56 - 1.82)                                                  |
| 50-64                                   | 2.26 (2 - 2.55)                                                           | 3.66 (3.24 - 4.15)                                                          | 2.29 (2.02 - 2.58)                                                     | 1.49 (1.32 - 1.69)                                                  |

|                         |                    |                    |                    |                    |
|-------------------------|--------------------|--------------------|--------------------|--------------------|
| 65-79                   | 1.98 (1.64 - 2.39) | 2.38 (1.97 - 2.87) | 1.87 (1.55 - 2.26) | 1.36 (1.12 - 1.65) |
| 80+                     | 1.38 (1.02 - 1.88) | 1.75 (1.28 - 2.38) | 1.18 (0.87 - 1.61) | 1.02 (0.74 - 1.42) |
| <b>Janssen-J&amp;J*</b> |                    |                    |                    |                    |
| 18-49                   | 1.45 (1.37 - 1.54) | NA                 | 1.82 (1.71 - 1.94) | 0.9 (0.84 - 0.97)  |
| 50-64                   | 1.0 (0.91 - 1.1)   | NA                 | 1.11 (1.01 - 1.21) | 0.73 (0.66 - 0.81) |
| 65-79                   | 0.83 (0.71 - 0.97) | NA                 | 0.86 (0.73 - 1.01) | 0.75 (0.63 - 0.89) |
| 80+                     | 0.75 (0.54 - 1.04) | NA                 | 0.74 (0.53 - 1.03) | 0.76 (0.53 - 1.08) |
| <b>Region</b>           |                    |                    |                    |                    |
| South                   | 1.95 (1.89 - 2.01) | 3.24 (3.14 - 3.35) | 2.18 (2.12 - 2.25) | 1.42 (1.37 - 1.46) |
| West                    | 2.02 (1.88 - 2.16) | 3.5 (3.25 - 3.76)  | 2.14 (1.99 - 2.3)  | 1.43 (1.33 - 1.54) |
| Northeast               | 2.49 (2.33 - 2.65) | 4.29 (4.02 - 4.58) | 2.97 (2.78 - 3.16) | 1.67 (1.56 - 1.78) |
| Midwest                 | 1.98 (1.86 - 2.11) | 3.34 (3.14 - 3.56) | 2.19 (2.06 - 2.33) | 1.38 (1.29 - 1.47) |

\*Janssen-J&J only includes March-June

Note: The Poisson regression models were stratified by vaccine product and controlled for age, cohort and region, including an interaction for age and cohort and an offset variable using person-time. 95% Confidence intervals are presented in parentheses. The widths of the intervals have not been adjusted for multiplicity and any the inferences drawn may not be reproducible.

**Supplemental Table 3. Adjusted rate ratios for COVID-19 death rates by time since vaccination, 14 jurisdictions, August 1-September 4, 2021, United States**

| Category                                 | January-June cohort vs. July cohort                                        | 2-month cohorts vs. July cohort                                              |                                                                         |                                                                      |
|------------------------------------------|----------------------------------------------------------------------------|------------------------------------------------------------------------------|-------------------------------------------------------------------------|----------------------------------------------------------------------|
|                                          | Rate ratio for COVID-19 death rate comparing January-June to July cohorts* | Rate ratio for COVID-19 death rate comparing January-February to July cohort | Rate ratio for COVID-19 death rate comparing March-April to July cohort | Rate ratio for COVID-19 death rate comparing May-June to July cohort |
| <b>Overall deaths (14 jurisdictions)</b> | 1.34 (1.03 - 1.76)                                                         | 1.7 (1.29 - 2.23)                                                            | 1.24 (0.94 - 1.63)                                                      | 1.22 (0.92 - 1.62)                                                   |
| <b>Age</b>                               |                                                                            |                                                                              |                                                                         |                                                                      |
| 18-49                                    | 1.13 (0.46 - 2.8)                                                          | 1.52 (0.51 - 4.54)                                                           | 1.47 (0.58 - 3.70)                                                      | 0.67 (0.25 - 1.81)                                                   |
| 50-64                                    | 1.65 (0.91 - 3.0)                                                          | 2.26 (1.19 - 4.32)                                                           | 1.68 (0.92 - 3.07)                                                      | 1.37 (0.73 - 2.56)                                                   |
| 65-79                                    | 0.95 (0.64 - 1.4)                                                          | 1.03 (0.69 - 1.53)                                                           | 0.92 (0.62 - 1.36)                                                      | 1.04 (0.69 - 1.58)                                                   |
| 80+                                      | 2.0 (1.13 - 3.53)                                                          | 2.59 (1.46 - 4.58)                                                           | 1.61 (0.91 - 2.85)                                                      | 1.69 (0.94 - 3.07)                                                   |
| <b>Vaccine product</b>                   |                                                                            |                                                                              |                                                                         |                                                                      |
| Pfizer-BioNTech                          | 2.49 (1.50 - 4.14)                                                         | 3.22 (1.93 - 5.38)                                                           | 2.15 (1.29 - 3.58)                                                      | 1.91 (1.12 - 3.25)                                                   |
| Moderna                                  | 1.68 (0.87 - 3.24)                                                         | 1.68 (0.87 - 3.27)                                                           | 1.62 (0.84 - 3.14)                                                      | 1.86 (0.95 - 3.66)                                                   |
| Janssen-Johnson & Johnson (J&J)*         | 0.64 (0.44 - 0.93)                                                         | NA                                                                           | 0.65 (0.44 - 0.94)                                                      | 0.62 (0.42 - 0.94)                                                   |
| <b>Vaccine product and age</b>           |                                                                            |                                                                              |                                                                         |                                                                      |
| <b>Pfizer-BioNTech</b>                   |                                                                            |                                                                              |                                                                         |                                                                      |
| 18-49                                    | 1.18 (0.28 - 4.92)                                                         | 1.58 (0.31 - 8.13)                                                           | 1.58 (0.37 - 6.74)                                                      | 0.57 (0.12 - 2.83)                                                   |
| 50-64                                    | 1.34 (0.6 - 3.03)                                                          | 2.1 (0.89 - 4.97)                                                            | 1.31 (0.58 - 2.98)                                                      | 1.02 (0.43 - 2.43)                                                   |
| 65-79                                    | 2.56 (1.06 - 6.18)                                                         | 2.89 (1.2 - 7.0)                                                             | 2.37 (0.98 - 5.74)                                                      | 2.37 (0.95 - 5.90)                                                   |
| 80+                                      | 6.98 (1.74 - 27.94)                                                        | 8.77 (2.19 - 35.12)                                                          | 5.03 (1.25 - 20.17)                                                     | 4.84 (1.18 - 19.9)                                                   |
| <b>Moderna**</b>                         |                                                                            |                                                                              |                                                                         |                                                                      |
| 18-49                                    | NA                                                                         | NA                                                                           | NA                                                                      | NA                                                                   |
| 50-64                                    | NA                                                                         | NA                                                                           | NA                                                                      | NA                                                                   |
| 65-79                                    | 0.84 (0.38 - 1.88)                                                         | 0.83 (0.37 - 1.88)                                                           | 0.82 (0.36 - 1.83)                                                      | 1.07 (0.46 - 2.50)                                                   |
| 80+                                      | 1.62 (0.52 - 5.04)                                                         | 1.64 (0.52 - 5.11)                                                           | 1.56 (0.50 - 4.88)                                                      | 1.97 (0.61 - 6.34)                                                   |

|                         |                    |                    |                    |                    |
|-------------------------|--------------------|--------------------|--------------------|--------------------|
| <b>Janssen-J&amp;J*</b> |                    |                    |                    |                    |
| 18-49                   | 0.56 (0.16 - 1.93) | NA                 | 0.91 (0.26 - 3.16) | 0.09 (0.01 - 0.84) |
| 50-64                   | 1.28 (0.52 - 3.13) | NA                 | 1.37 (0.56 - 3.38) | 1.05 (0.41 - 2.72) |
| 65-79                   | 0.5 (0.29 - 0.84)  | NA                 | 0.48 (0.28 - 0.82) | 0.55 (0.31 - 0.99) |
| 80+                     | 0.54 (0.25 - 1.16) | NA                 | 0.51 (0.24 - 1.11) | 0.63 (0.27 - 1.44) |
| <b>Region</b>           |                    |                    |                    |                    |
| South                   | 1.26 (0.94 - 1.70) | 1.55 (1.14 - 2.10) | 1.17 (0.87 - 1.58) | 1.16 (0.85 - 1.60) |
| West                    | 1.52 (0.49 - 4.75) | 2.03 (0.64 - 6.40) | 1.32 (0.42 - 4.15) | 1.81 (0.55 - 5.91) |
| Northeast               | 1.67 (0.62 - 4.49) | 2.45 (0.90 - 6.68) | 1.55 (0.57 - 4.18) | 1.31 (0.46 - 3.68) |
| Midwest                 | 1.92 (0.62 - 5.98) | 2.54 (0.81 - 7.97) | 1.76 (0.56 - 5.49) | 1.47 (0.45 - 4.8)  |

\*Janssen-J&J only includes March-June

\*\* There were no deaths in July among 18-64 year old recipients of Moderna.

Note: The Poisson regression models were stratified by vaccine product and controlled for age, cohort and region, including an interaction for age and cohort and an offset variable using person-time. Due to limited number of deaths in July for some cells, adjusted rate ratio estimates are unstable and should be interpreted with caution. Deaths among 12-17 year old Pfizer recipients were excluded due to small cell size across all cohorts. 95% Confidence intervals are presented in parentheses. The widths of the intervals have not been adjusted for multiplicity and any the inferences drawn may not be reproducible.



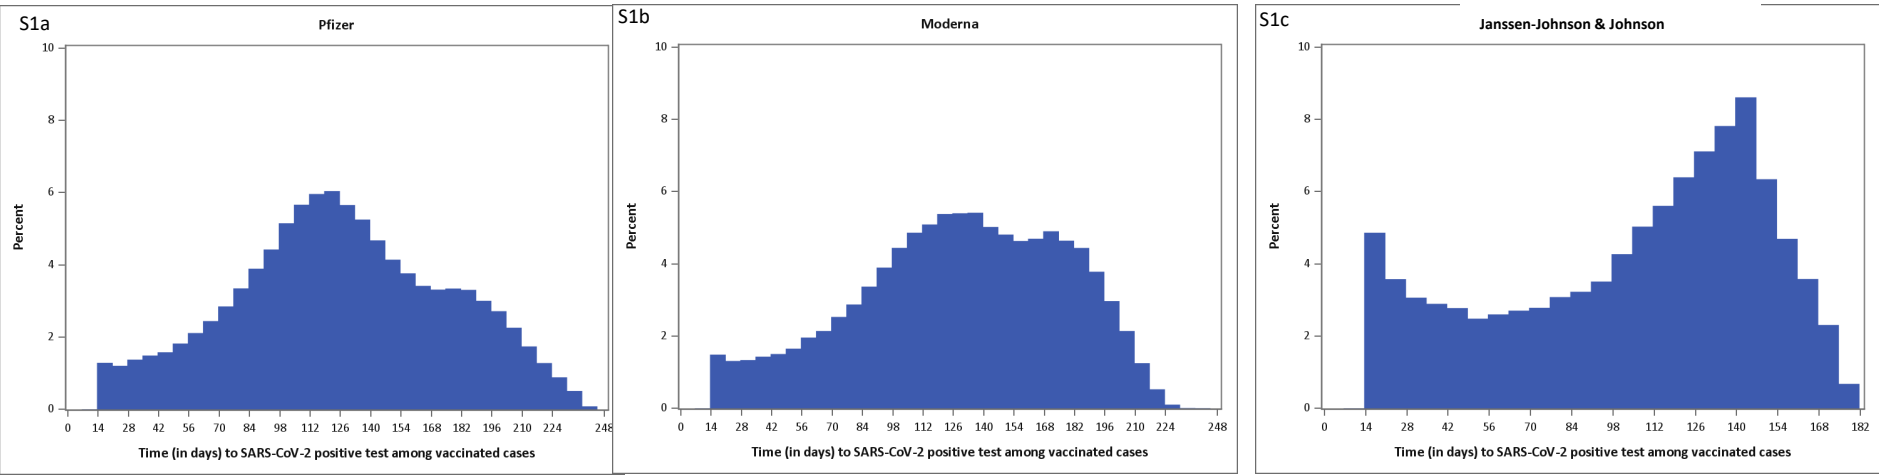

Supplemental Figure 1. Distribution of the numbers of days after receiving vaccine dose to positive SAR-CoV-2 positive test among persons vaccinated with a) Pfizer-BioNTech, b) Moderna and c) Janssen-Johnson & Johnson, 15 jurisdictions, January 3-September 4, 2021, United States

Note: there is a shorter x-axis for Janssen-Johnson & Johnson vaccine since it became available later in the year compared to mRNA vaccines.

Age (Years) = 12-17

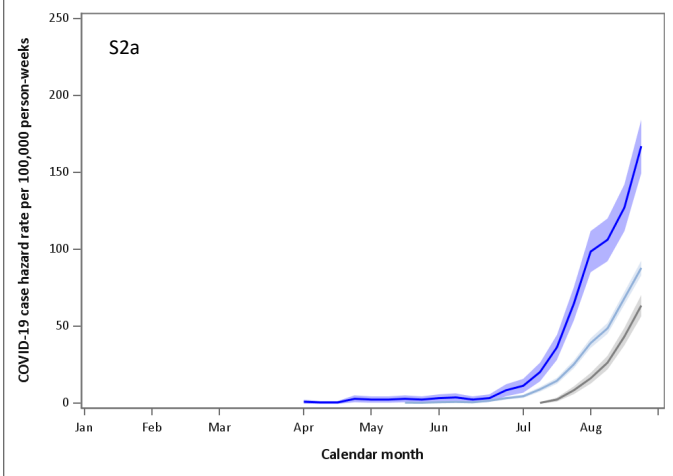

Pfizer

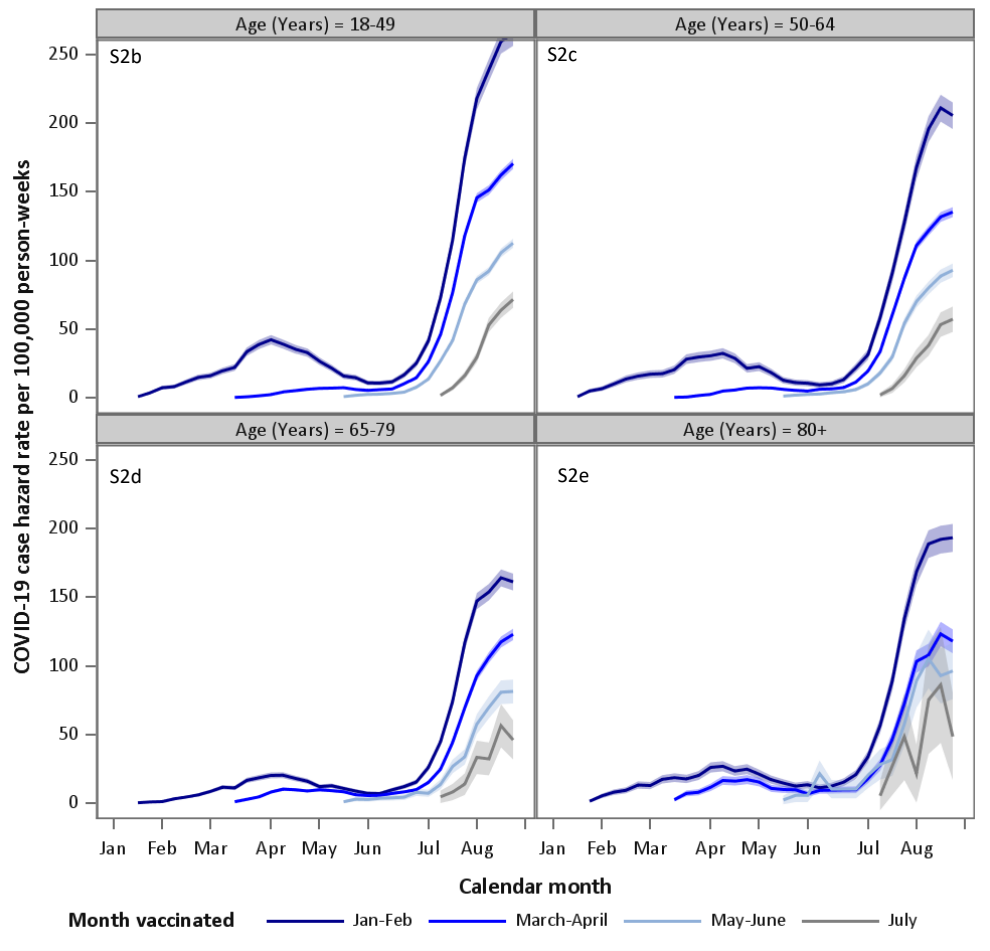

Supplemental Figure 2a-m. COVID-19 case hazard rates by vaccination cohort and age group for Pfizer-BioNTech (a-e), Moderna (f-i) and Janssen-Johnson & Johnson (j-m), 15 Jurisdictions, January 3-September 4, 2021, United States

Note: 95% confidence intervals presented around hazard curves. The widths of the intervals have not been adjusted for multiplicity and any the inferences drawn may not be reproducible. Excluded persons vaccinated with Janssen-Johnson & Johnson in the January-February cohort and all persons aged 12-17 vaccinated either with Moderna or Janssen-Johnson & Johnson.

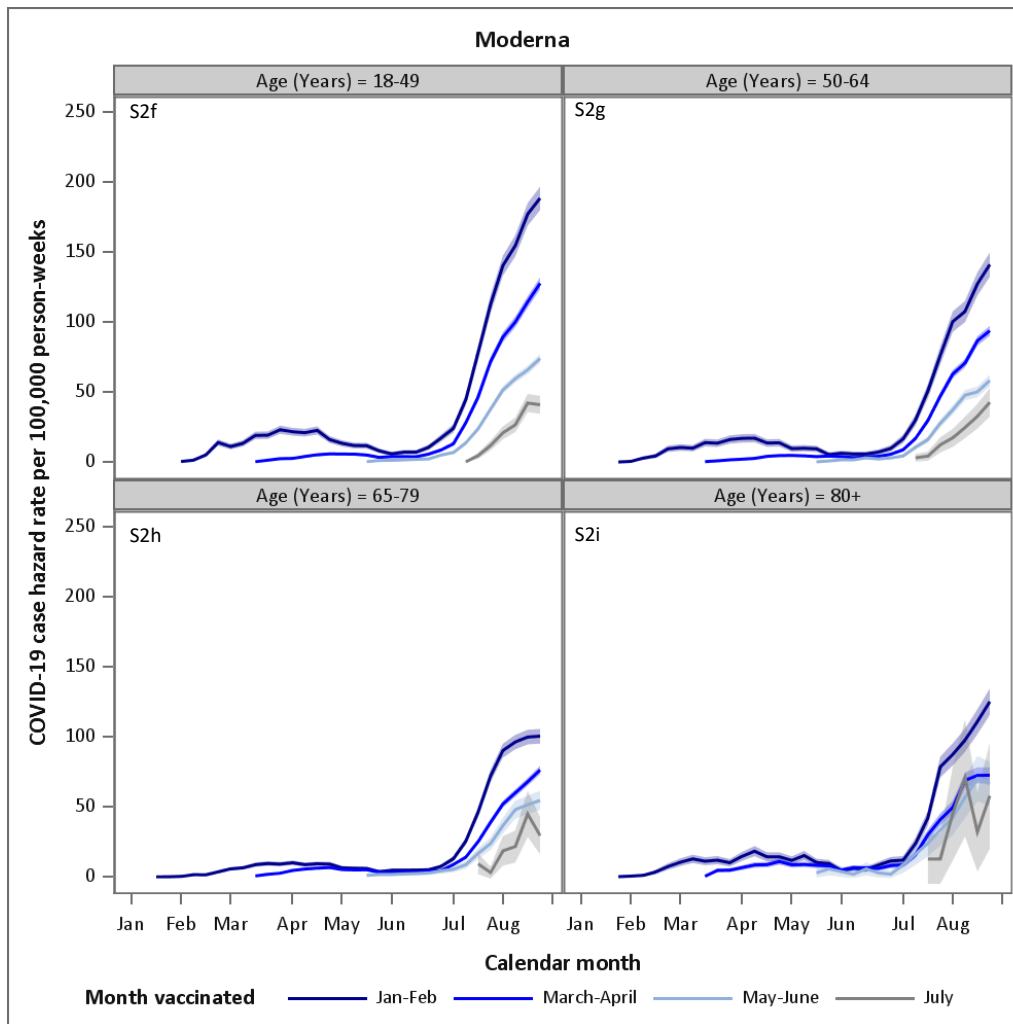

Supplemental Figure 2a-m. COVID-19 case hazard rates by vaccination cohort and age group for Pfizer-BioNTech (a-e), Moderna (f-i) and Janssen-Johnson & Johnson (j-m), 15 Jurisdictions, January 3-September 4, 2021, United States

Note: 95% confidence intervals presented around hazard curves. The widths of the intervals have not been adjusted for multiplicity and any the inferences drawn may not be reproducible. Excluded persons vaccinated with Janssen-Johnson & Johnson in the January-February cohort and all persons aged 12-17 vaccinated either with Moderna or Janssen-Johnson & Johnson.

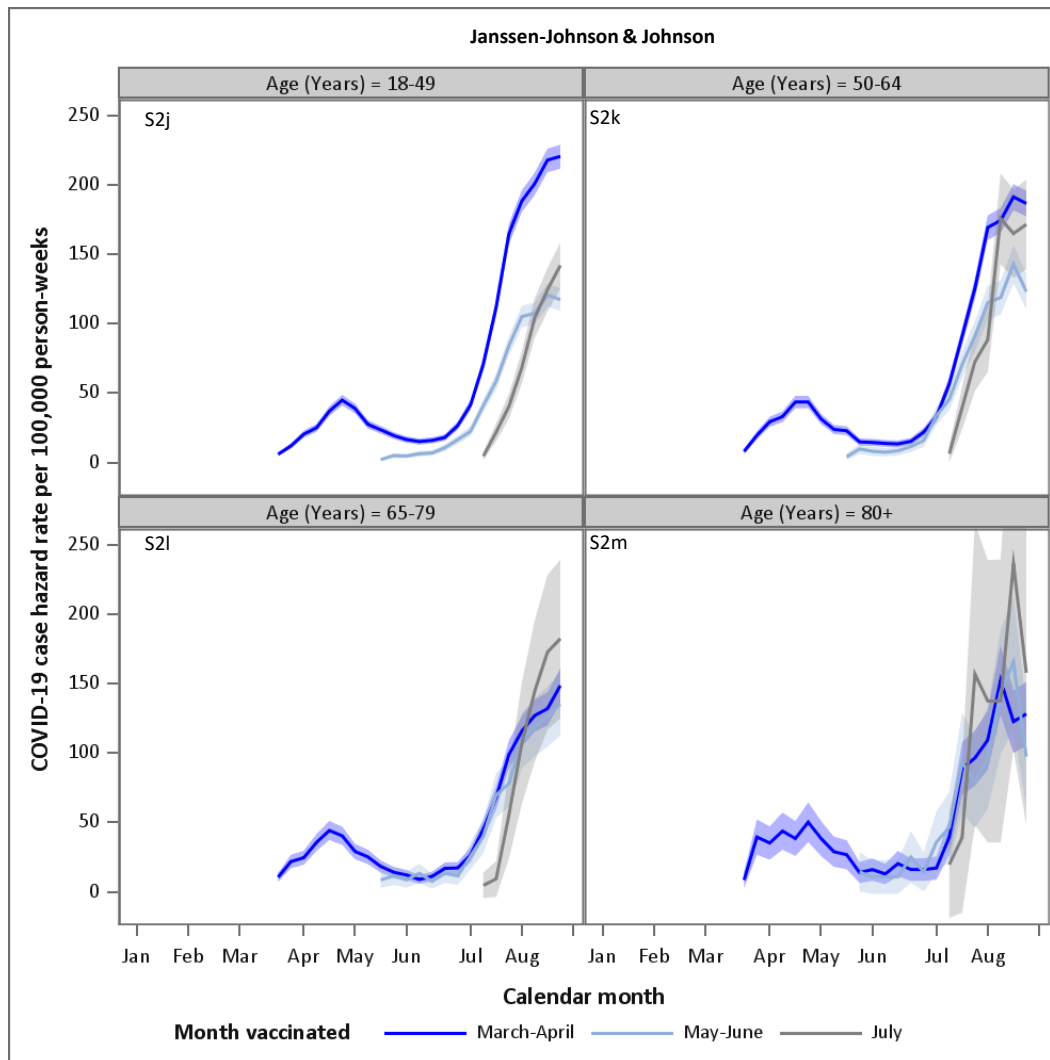

Supplemental Figure 2a-m. COVID-19 case hazard rates by vaccination cohort and age group for Pfizer-BioNTech (a-e), Moderna (f-i) and Janssen-Johnson & Johnson (j-m), 15 Jurisdictions, January 3-September 4, 2021, United States

Note: 95% confidence intervals presented around hazard curves. The widths of the intervals have not been adjusted for multiplicity and any the inferences drawn may not be reproducible. Excluded persons vaccinated with Janssen-Johnson & Johnson in the January-February cohort and all persons aged 12-17 vaccinated either with Moderna or Janssen-Johnson & Johnson.

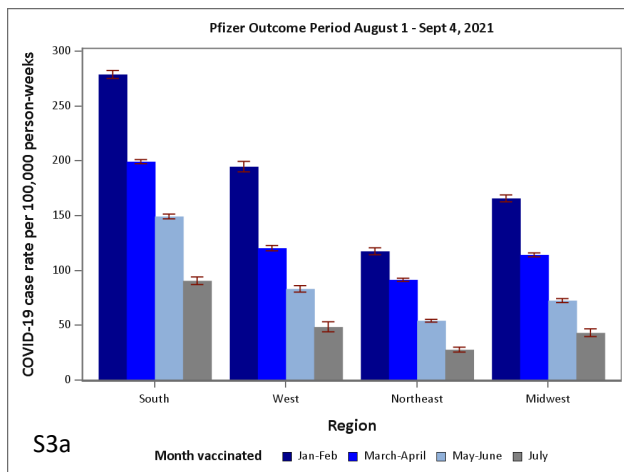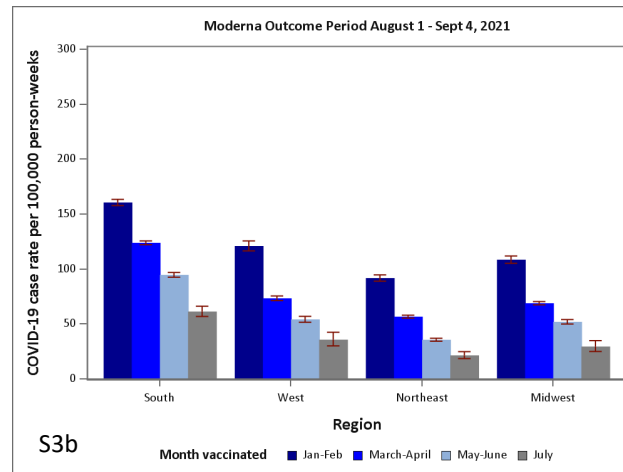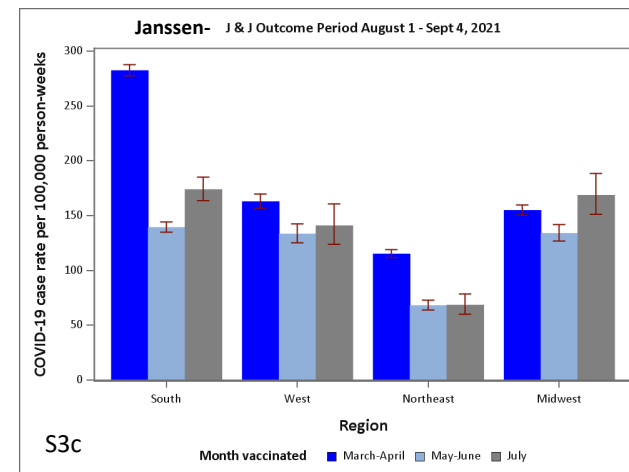

## Supplemental Figure 3a-3c. COVID-19 case rates by vaccination cohort and region for a) Pfizer-BioNTech, b) Moderna and c) Janssen-Johnson & Johnson, 15 Jurisdictions, August 1-September 4, 2021, United States

Note: Excluded persons vaccinated with Janssen-Johnson & Johnson in the January-February cohort and all persons aged 12-17 vaccinated either with Moderna or Janssen-Johnson & Johnson. Error bars represent 95% confidence intervals. The widths of the intervals have not been adjusted for multiplicity and any the inferences drawn may not be reproducible.

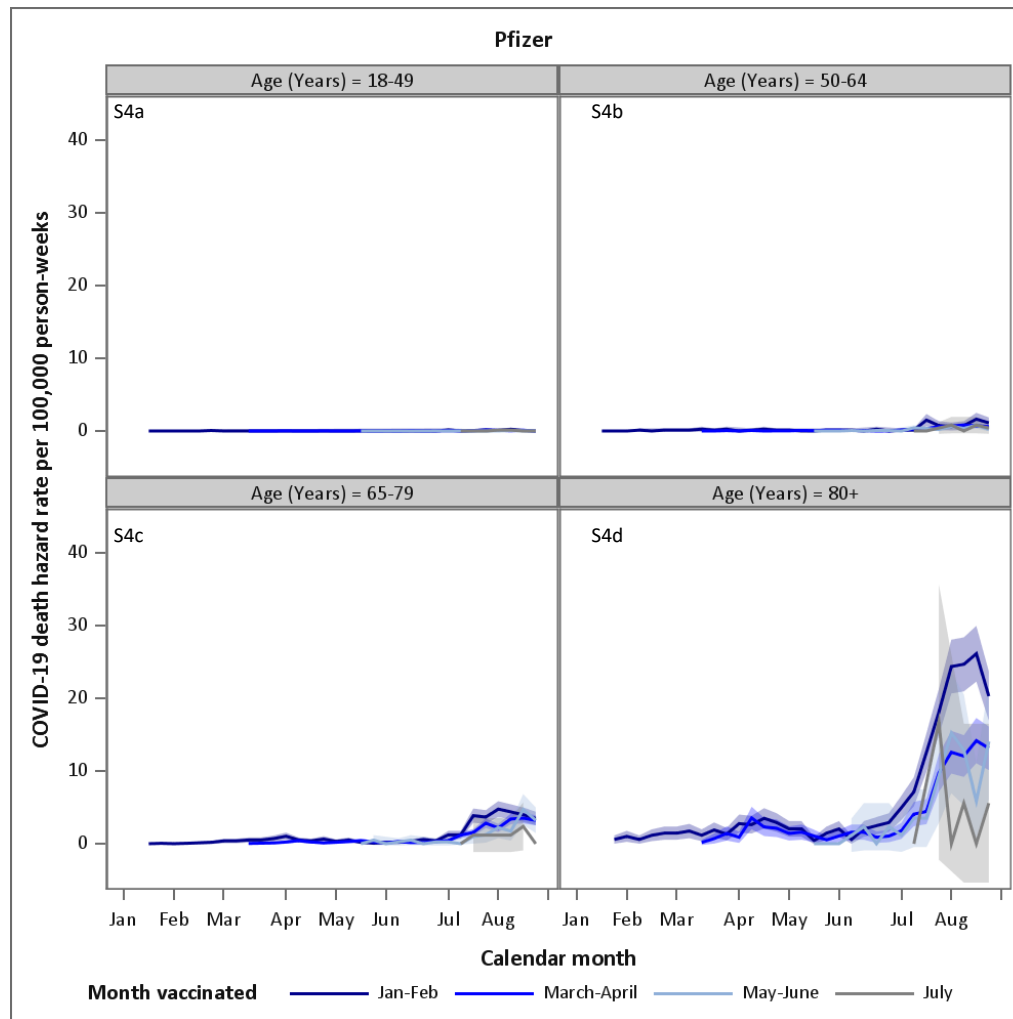

Supplemental Figure 4a-l. COVID-19 death hazard rates by vaccination cohort and age group for Pfizer-BioNTech (a-d), Moderna (e-h) and Janssen-Johnson & Johnson (i-l), 14 Jurisdictions, January 3-September 4, 2021, United States

Note: 95% confidence intervals presented around hazard curves. The widths of the intervals have not been adjusted for multiplicity and any the inferences drawn may not be reproducible. Excluded persons vaccinated with Janssen-Johnson & Johnson in the January-February cohort and all persons aged 12-17 vaccinated either with Moderna or Janssen-Johnson & Johnson. Due to few deaths in July cohort hazard rate may be unstable and should be interpreted with caution. Deaths for 12-17 not shown. Only 1 death noted among 12-17 in March-April cohort.

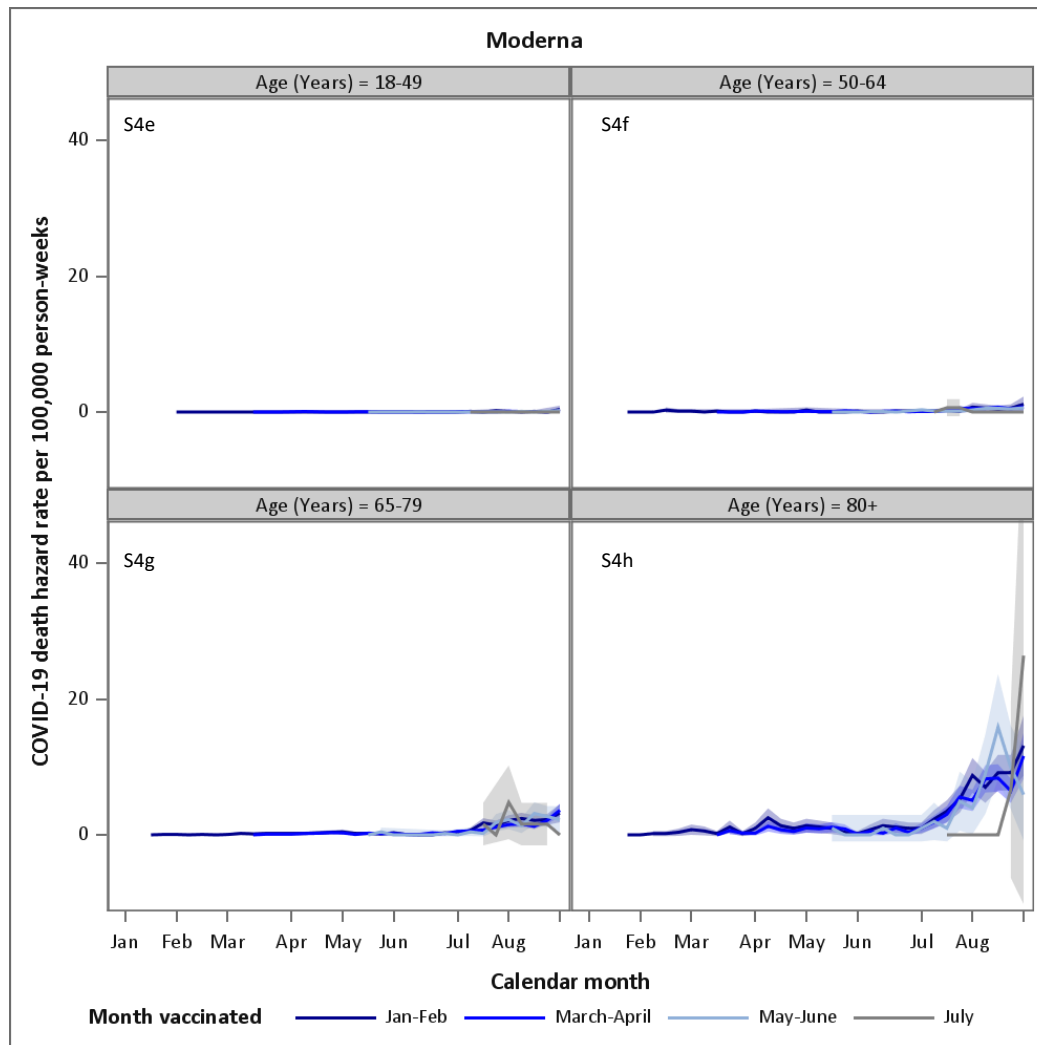

Supplemental Figure 4a-l. COVID-19 death hazard rates by vaccination cohort and age group for Pfizer-BioNTech (a-d), Moderna (e-h) and Janssen-Johnson & Johnson (i-l), 14 Jurisdictions, January 3-September 4, 2021, United States

Note: 95% confidence intervals presented around hazard curves. The widths of the intervals have not been adjusted for multiplicity and any the inferences drawn may not be reproducible. Excluded persons vaccinated with Janssen-Johnson & Johnson in the January-February cohort and all persons aged 12-17 vaccinated either with Moderna or Janssen-Johnson & Johnson. Due to few deaths in July cohort hazard rate may be unstable and should be interpreted with caution. Deaths for 12-17 not shown. Only 1 death noted among 12-17 in March-April cohort.

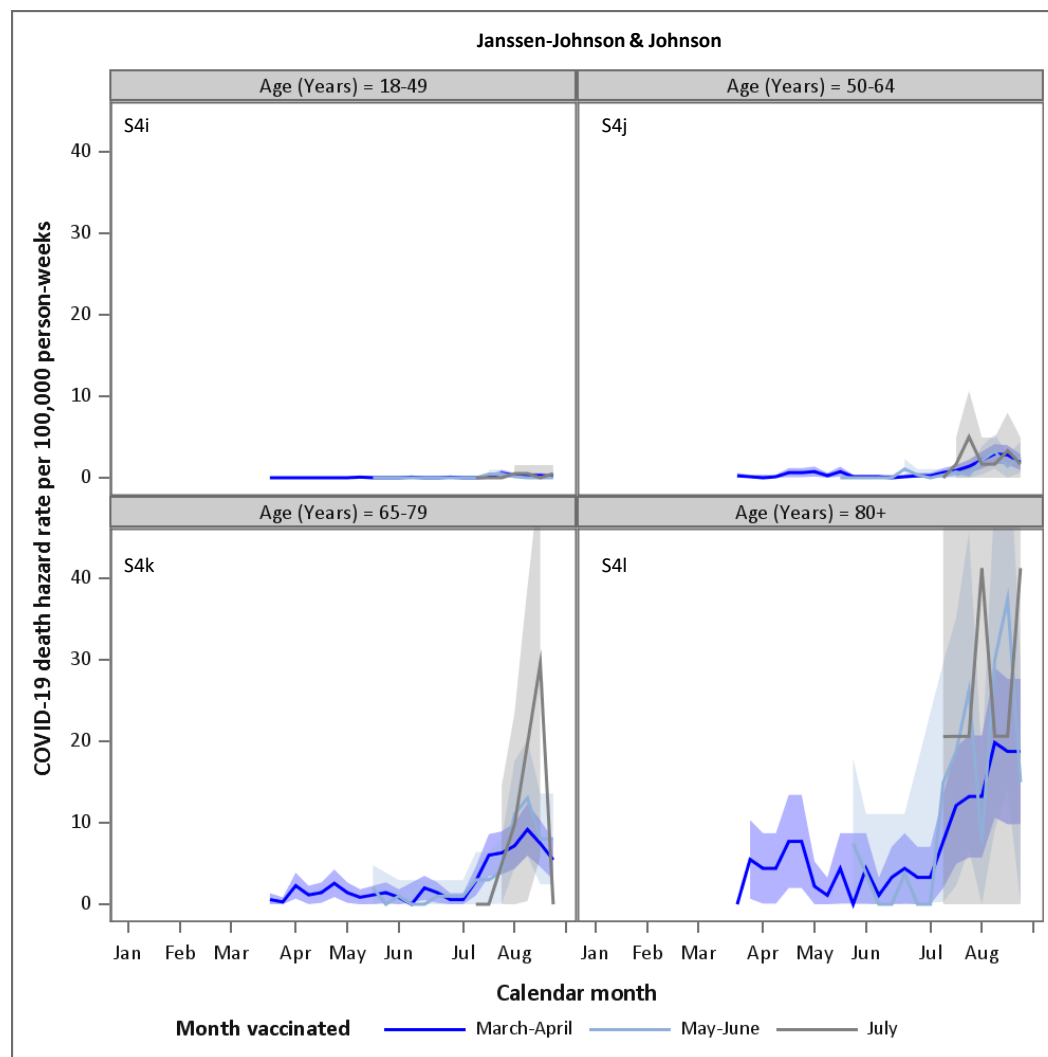

Supplemental Figure 4a-l. COVID-19 death hazard rates by vaccination cohort and age group for Pfizer-BioNTech (a-d), Moderna (e-h) and Janssen-Johnson & Johnson (i-l), 14 Jurisdictions, January 3-September 4, 2021, United States

Note: 95% confidence intervals presented around hazard curves. The widths of the intervals have not been adjusted for multiplicity and any the inferences drawn may not be reproducible. Excluded persons vaccinated with Janssen-Johnson & Johnson in the January-February cohort and all persons aged 12-17 vaccinated either with Moderna or Janssen-Johnson & Johnson. Due to few deaths in July cohort hazard rate may be unstable and should be interpreted with caution. Deaths for 12-17 not shown. Only 1 death noted among 12-17 in March-April cohort.



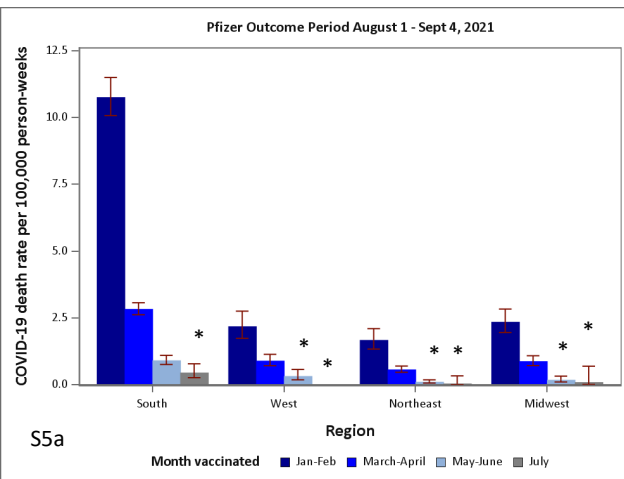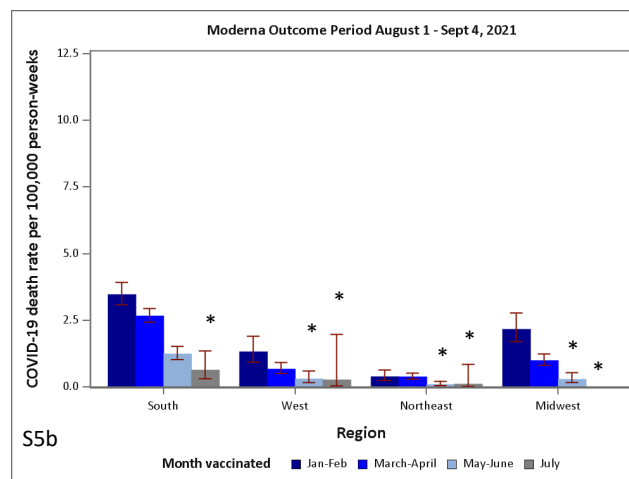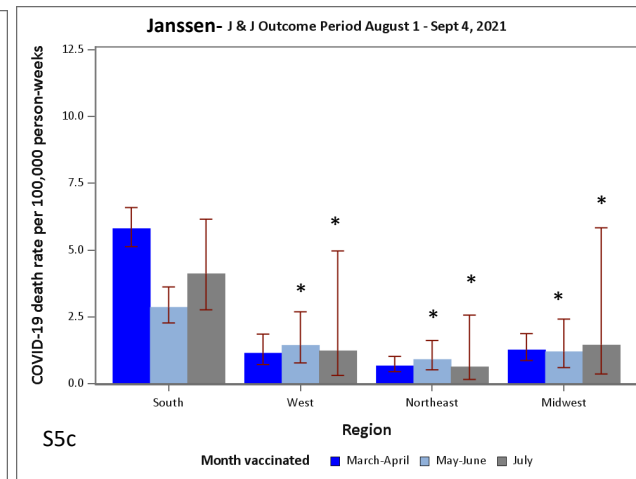

Supplemental Figure 5a-5c. COVID-19 death rates by vaccination cohort and region for a) Pfizer-BioNTech, b) Moderna and c) Janssen-Johnson & Johnson, 15 Jurisdictions, August 1-September 4, 2021, United States

Note: Excluded persons vaccinated with Janssen- Johnson & Johnson in the January-February cohort and all persons aged 12-17 vaccinated either with Moderna or Janssen-Johnson & Johnson. Error bars represent 95% confidence intervals. The widths of the intervals have not been adjusted for multiplicity and any the inferences drawn may not be reproducible. For death counts  $\leq 15$  marked with (\*), rates may be unstable and should be interpreted with caution.
